# Supplementary material for: In(OTf)3-catalyzed tandem aza-Piancatelli rearrangement/Michael reaction for the synthesis of 3,4-dihydro-2H-benzo[b][1,4]thiazine and oxazine derivatives
Source: Royal Society of Chemistry journal article supplement (doi:10.1039/c2ra21591h), 2012-01-01

## Supplementary Material (ESI)

### In(OTf)<sub>3</sub> catalyzed tandem aza-Piancatelli rearrangement/Michael reaction sequence for the synthesis of 3,4-dihydro-2*H*-benzo[*b*][1,4]thiazine and oxazine derivatives

B. V. Subba Reddy,<sup>\*</sup> Y. Vikram Reddy, P. Subba Lakshumma, G. Narasimhulu, J. S. Yadav, B. Sridhar,<sup>b</sup>  
P. Purushotham Reddy,<sup>c</sup> A. C. Kunwar<sup>c</sup>

#### Table of Contents

1. Copies of <sup>1</sup>H and <sup>13</sup>C NMR spectra of products S2-S26

#### Details about the X-crystallography:

X-ray data for compounds AN45 were collected at room temperature using a Bruker Smart Apex CCD diffractometer with graphite monochromated MoK $\alpha$  radiation ( $\lambda=0.71073\text{\AA}$ ) with  $\omega$ -scan method.<sup>1</sup> Preliminary lattice parameters and orientation matrices were obtained from four sets of frames. Integration and scaling of intensity data were accomplished using SAINT program.<sup>1</sup> The structures were solved by Direct Methods using SHELXS97<sup>2</sup> and refinement was carried out by full-matrix least-squares technique using SHELXL97.<sup>2</sup> Anisotropic displacement parameters were included for all non-hydrogen atoms. N-bound H atom was located in a difference Fourier density map and refined isotropically. All other H atoms were located in difference density maps, but were positioned geometrically and included as riding atoms, with C-H = 0.93 (aromatic), 0.96 (methyl) or 0.97  $\text{\AA}$  (methylene) and with  $U_{\text{iso}}(\text{H}) = 1.5U_{\text{eq}}(\text{C})$  for the methyl groups and  $1.2U_{\text{eq}}(\text{C})$  otherwise. The methyl groups were allowed to rotate but not to tip.

1. SMART & SAINT. Software Reference manuals. Versions 6.28a & 5.625, Bruker Analytical X-ray Systems Inc., Madison, Wisconsin, U.S.A., 2001.
2. Sheldrick, G. M. (2008). Acta Cryst. A64, 112-122.

Figure caption: The molecular structure of (**3g**), with the atom-numbering scheme. Displacement ellipsoids are drawn at the 30% probability level.

**<sup>1</sup>H NMR Spectrum of Compound 3a.**

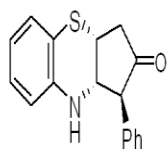

**3a**

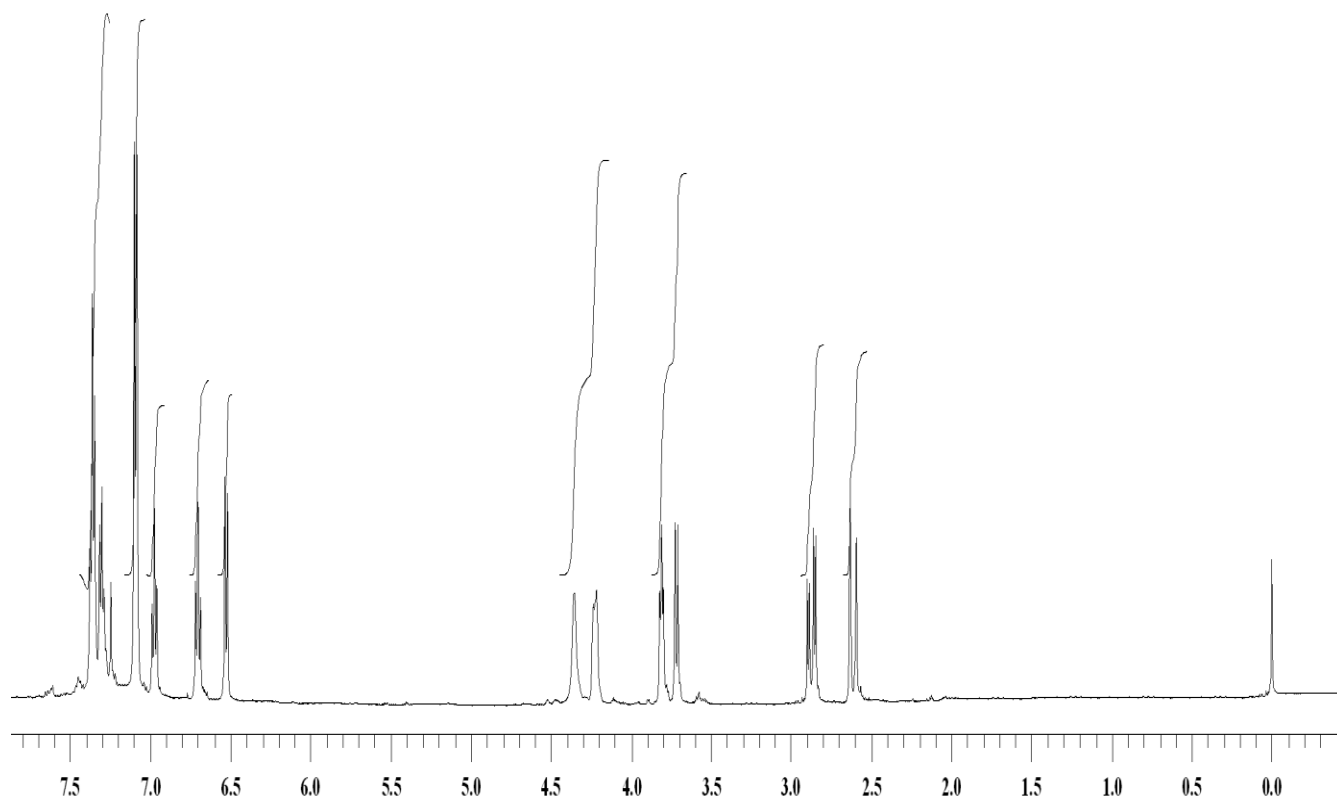

**$^{13}\text{C}$  spectrum of compound 3a:**

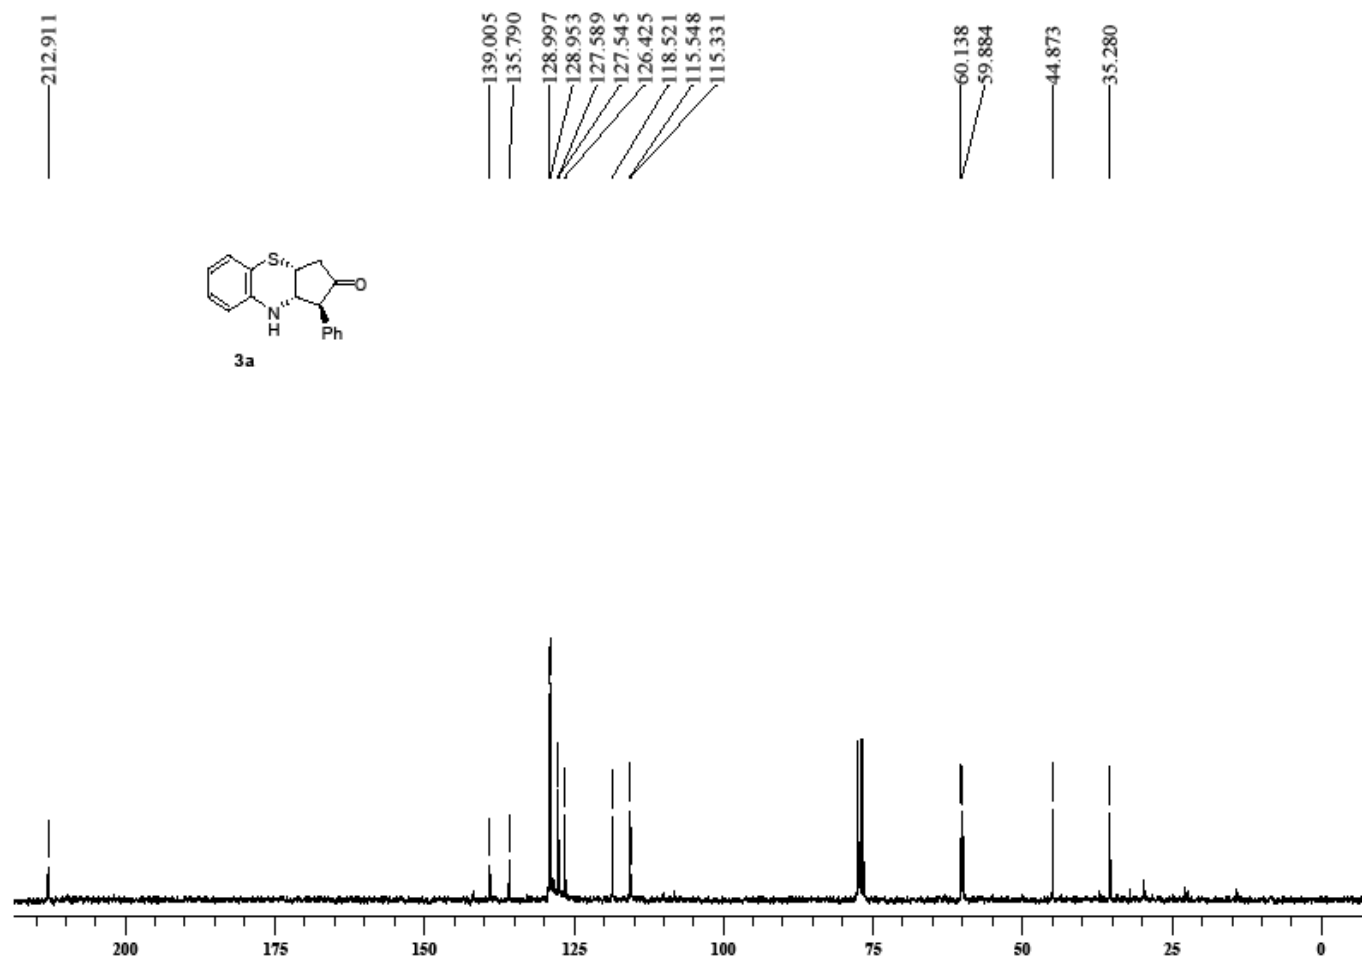

### <sup>1</sup>H NMR Spectrum of Compound 3b.

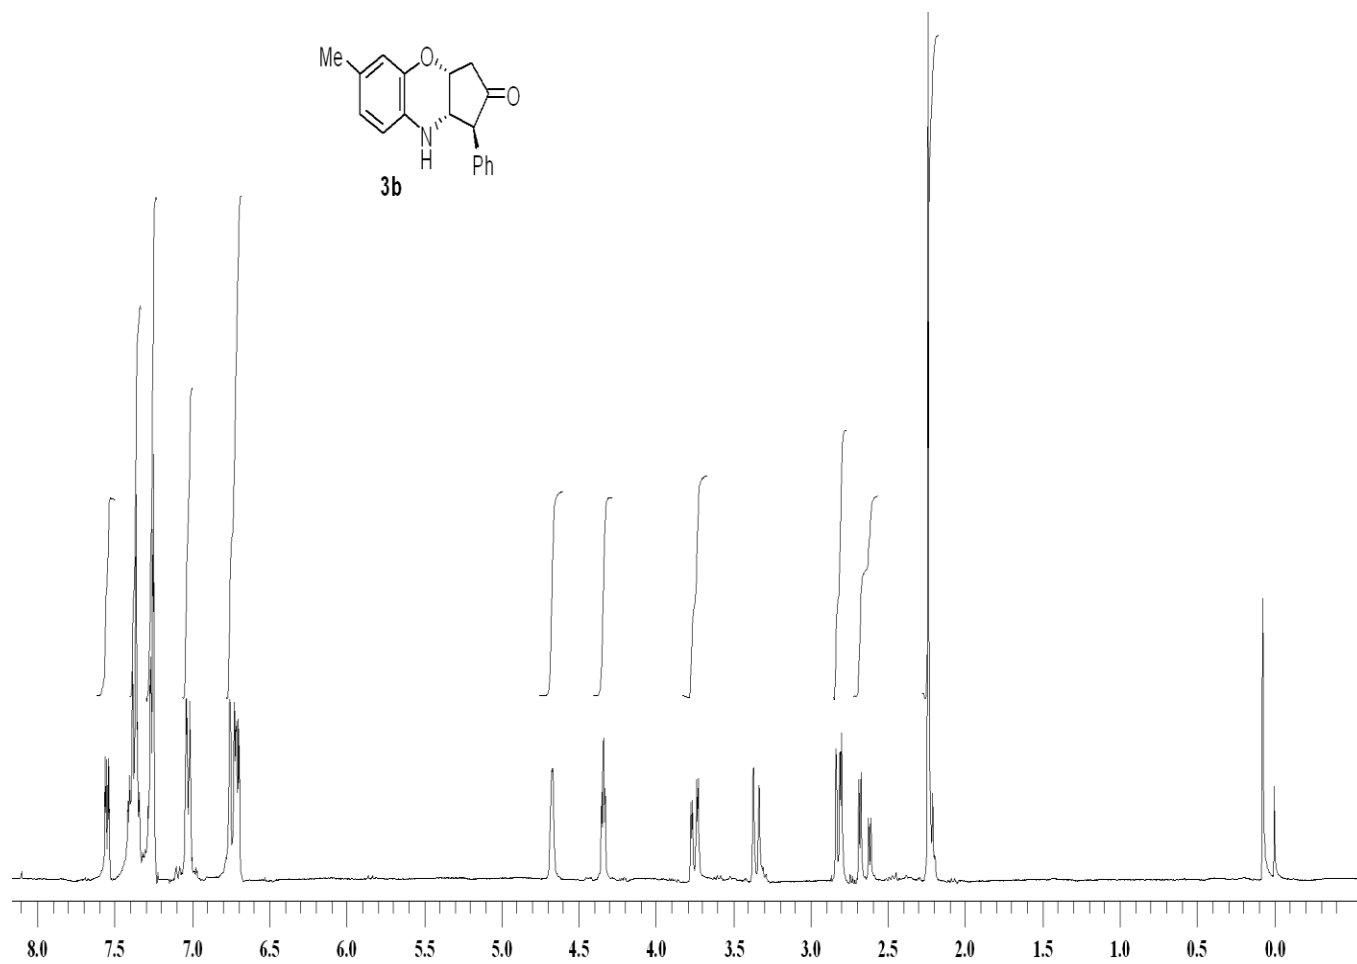

**$^{13}\text{C}$  spectrum of compound 3b:**

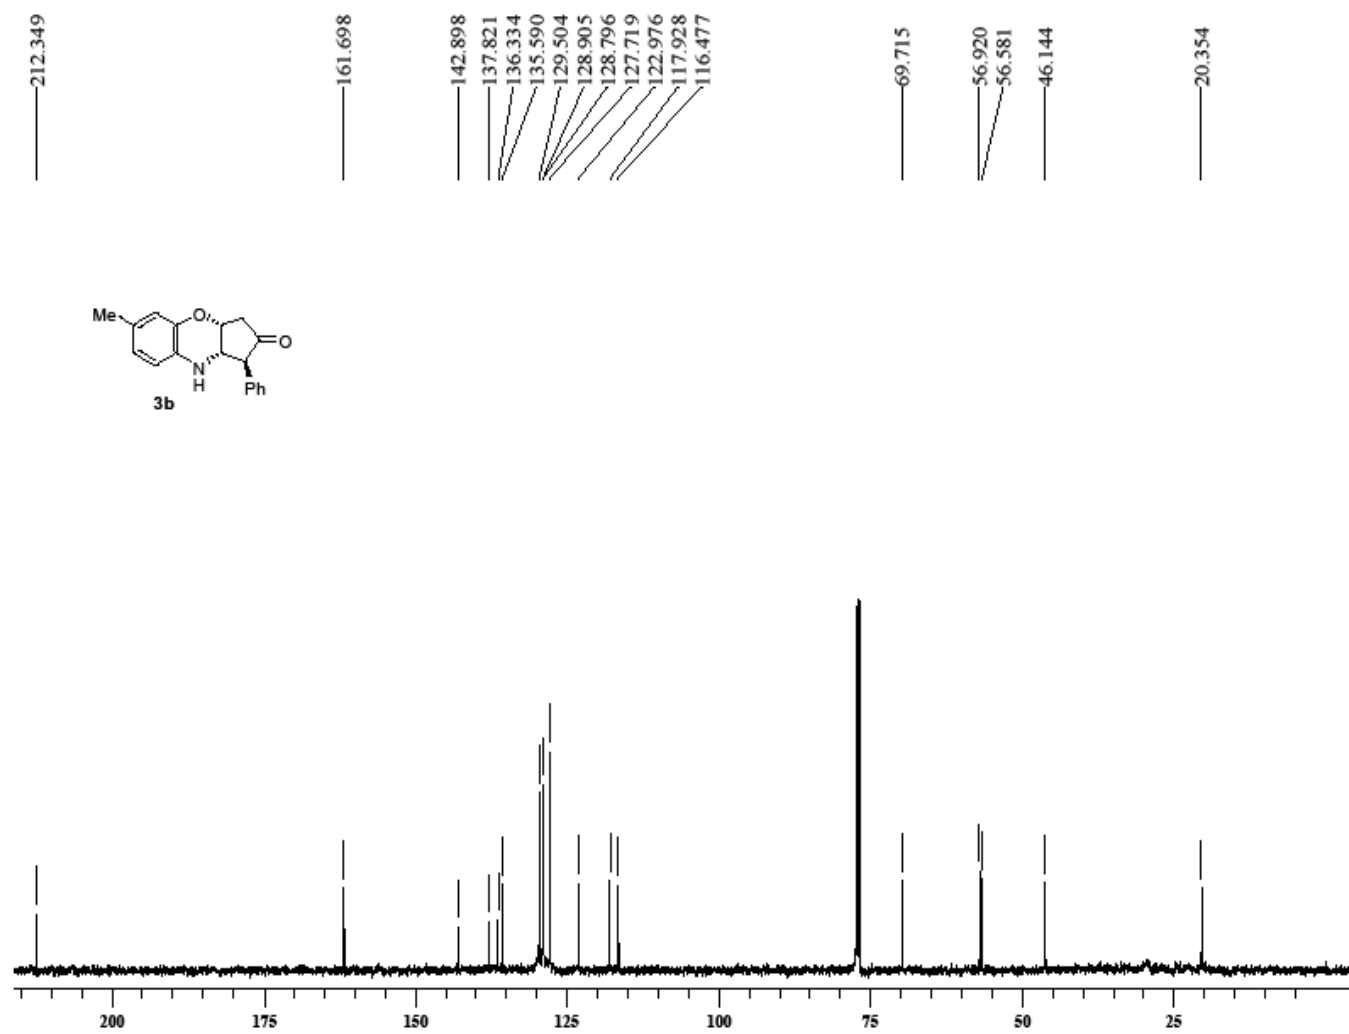

**<sup>1</sup>HNMR Spectrum of Compound 3c.**

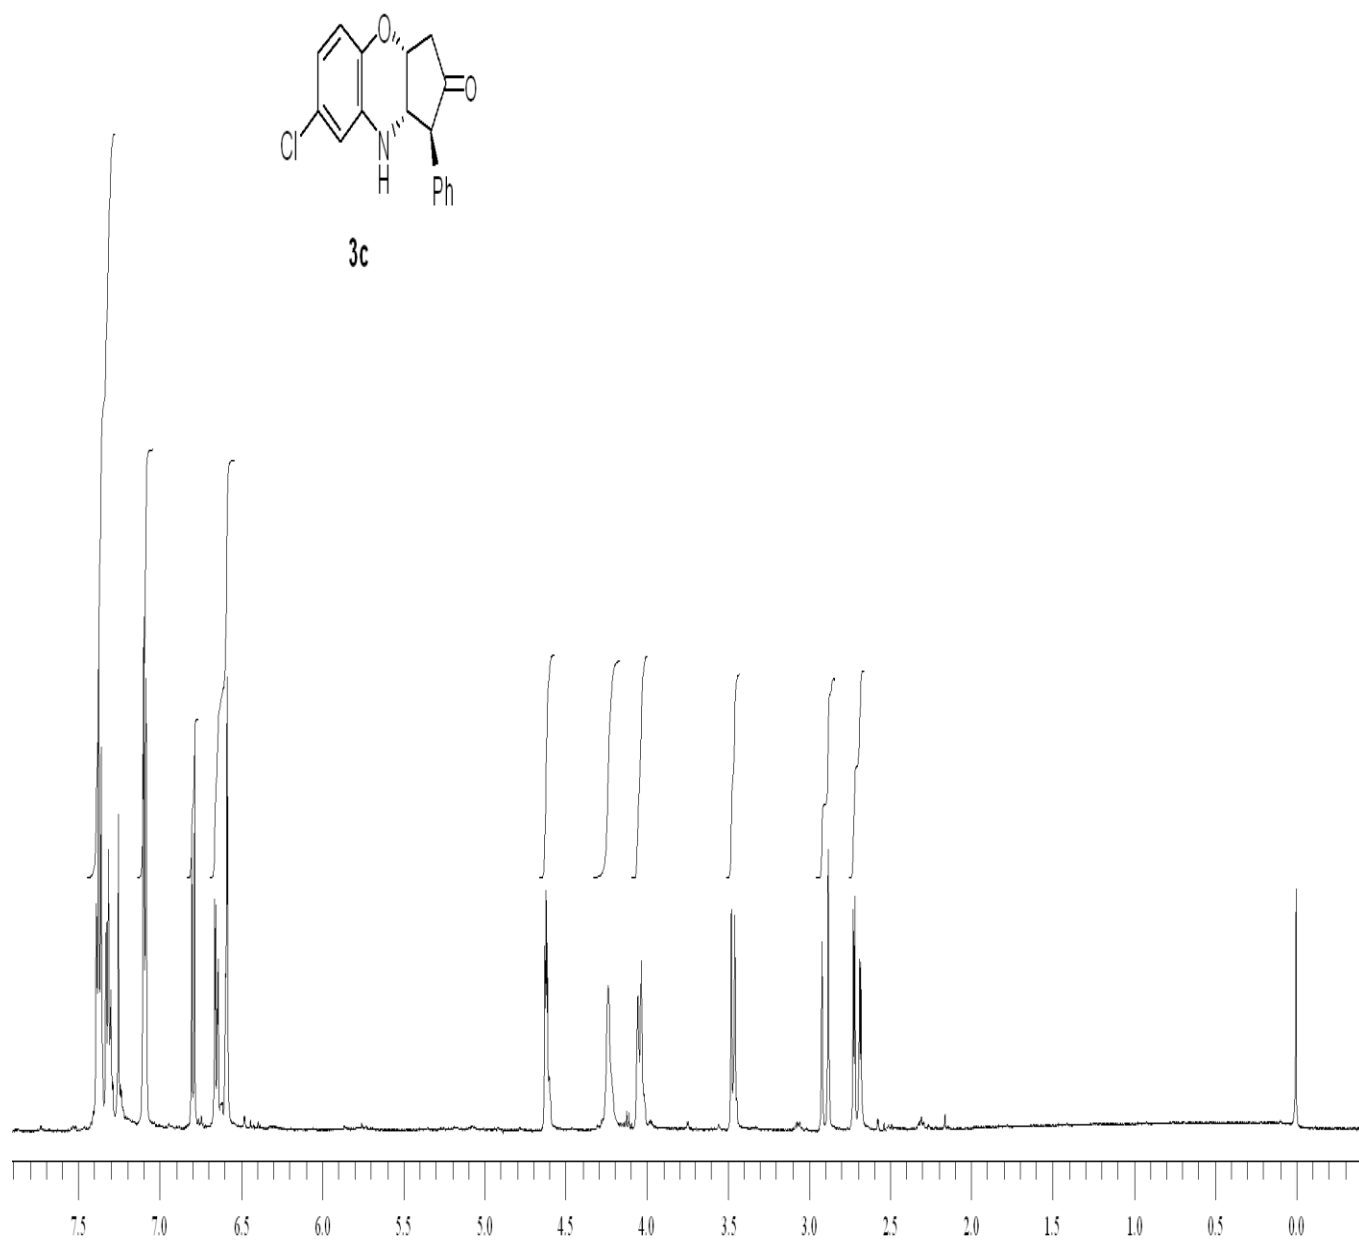

**$^{13}\text{C}$  spectrum of compound 3c:**

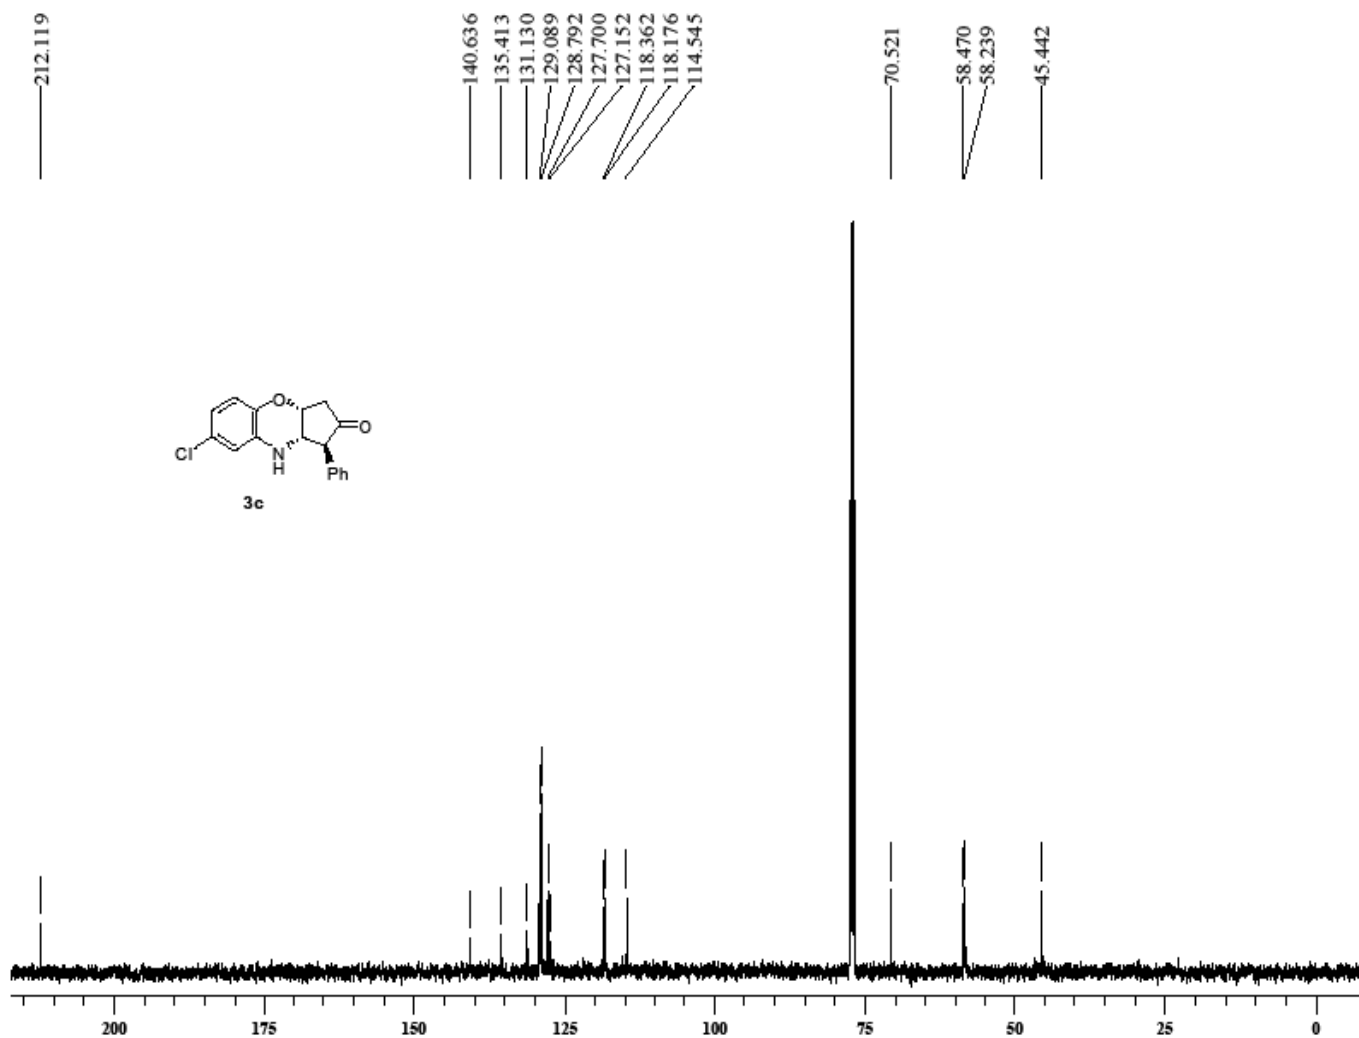

### <sup>1</sup>H NMR Spectrum of Compound 3d:

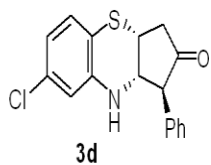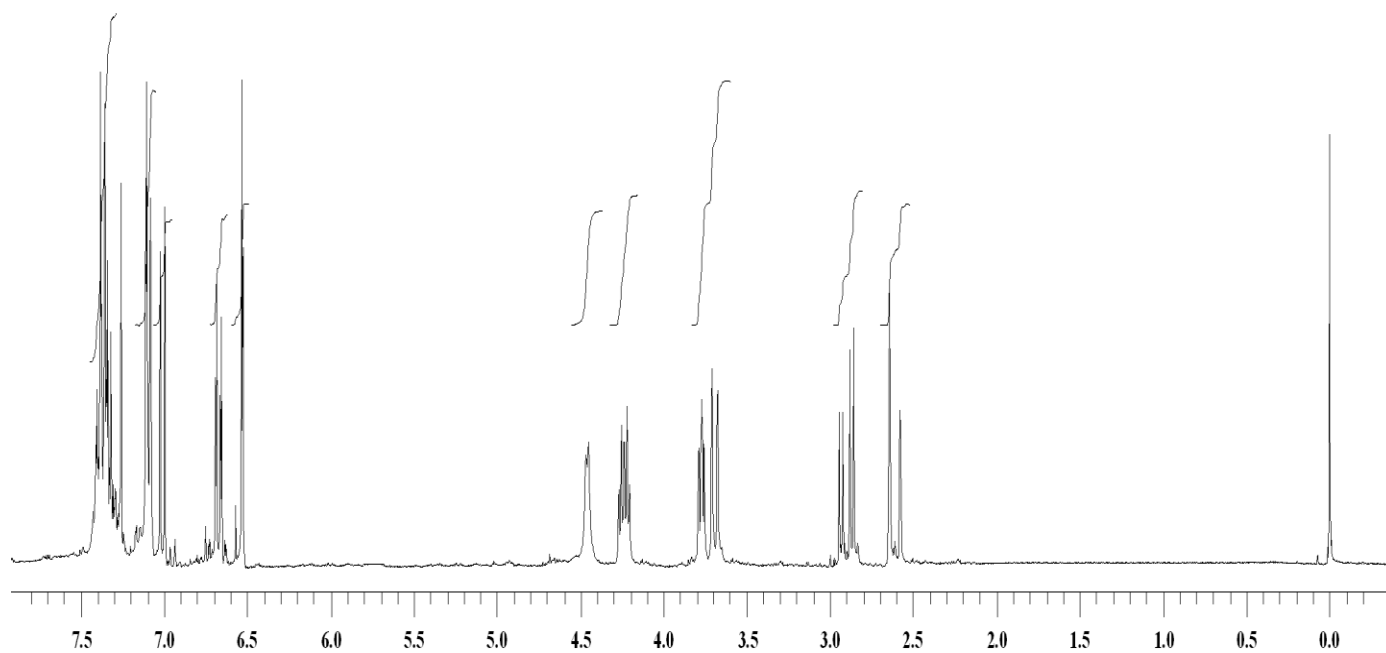



### <sup>13</sup>C spectrum of compound 3d:

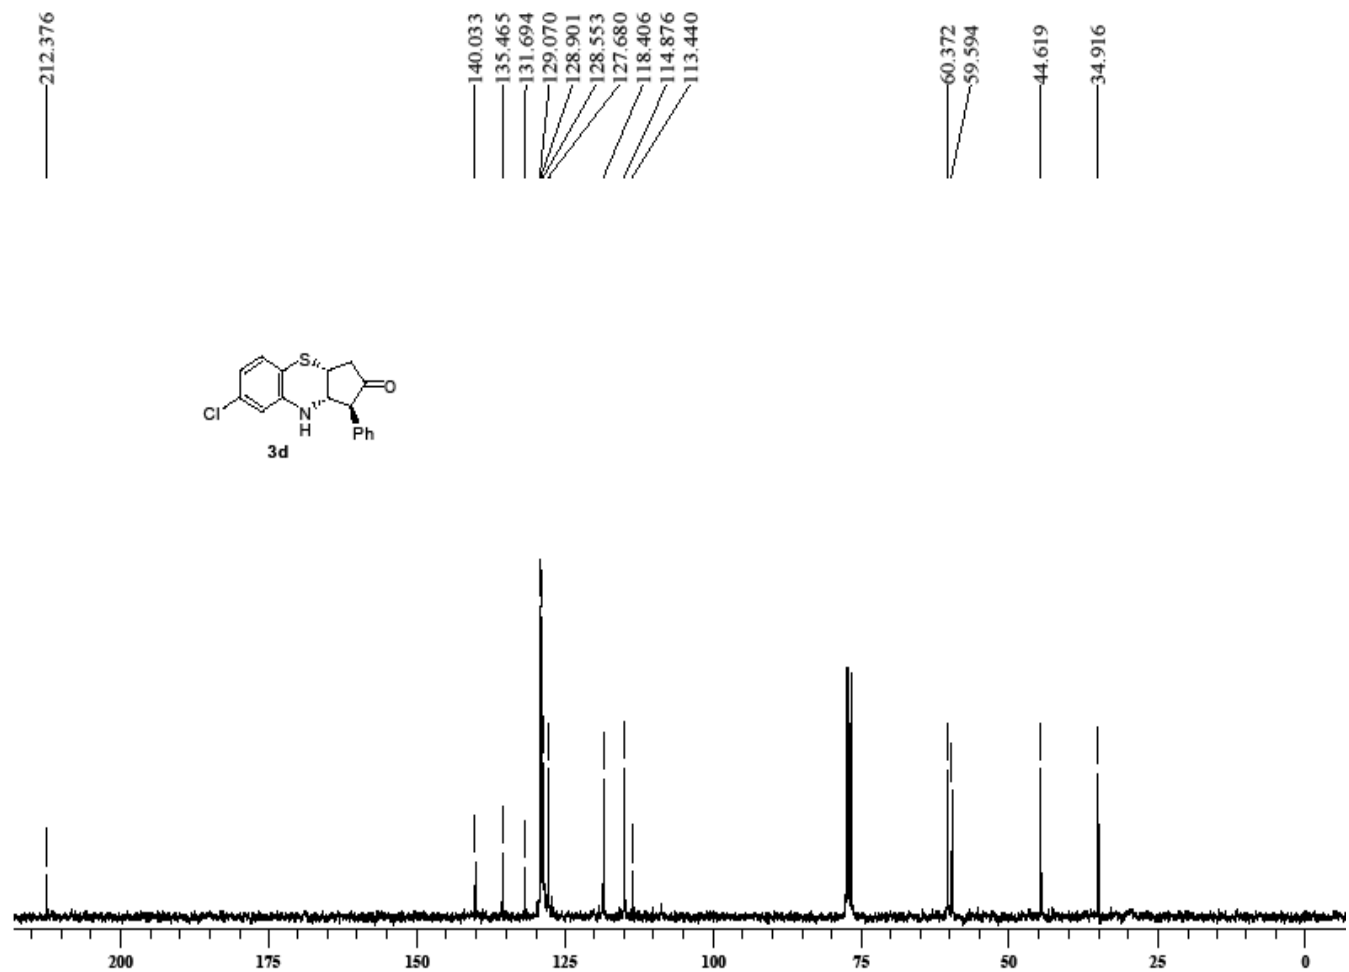

**<sup>1</sup>H NMR Spectrum of Compound 3e:**

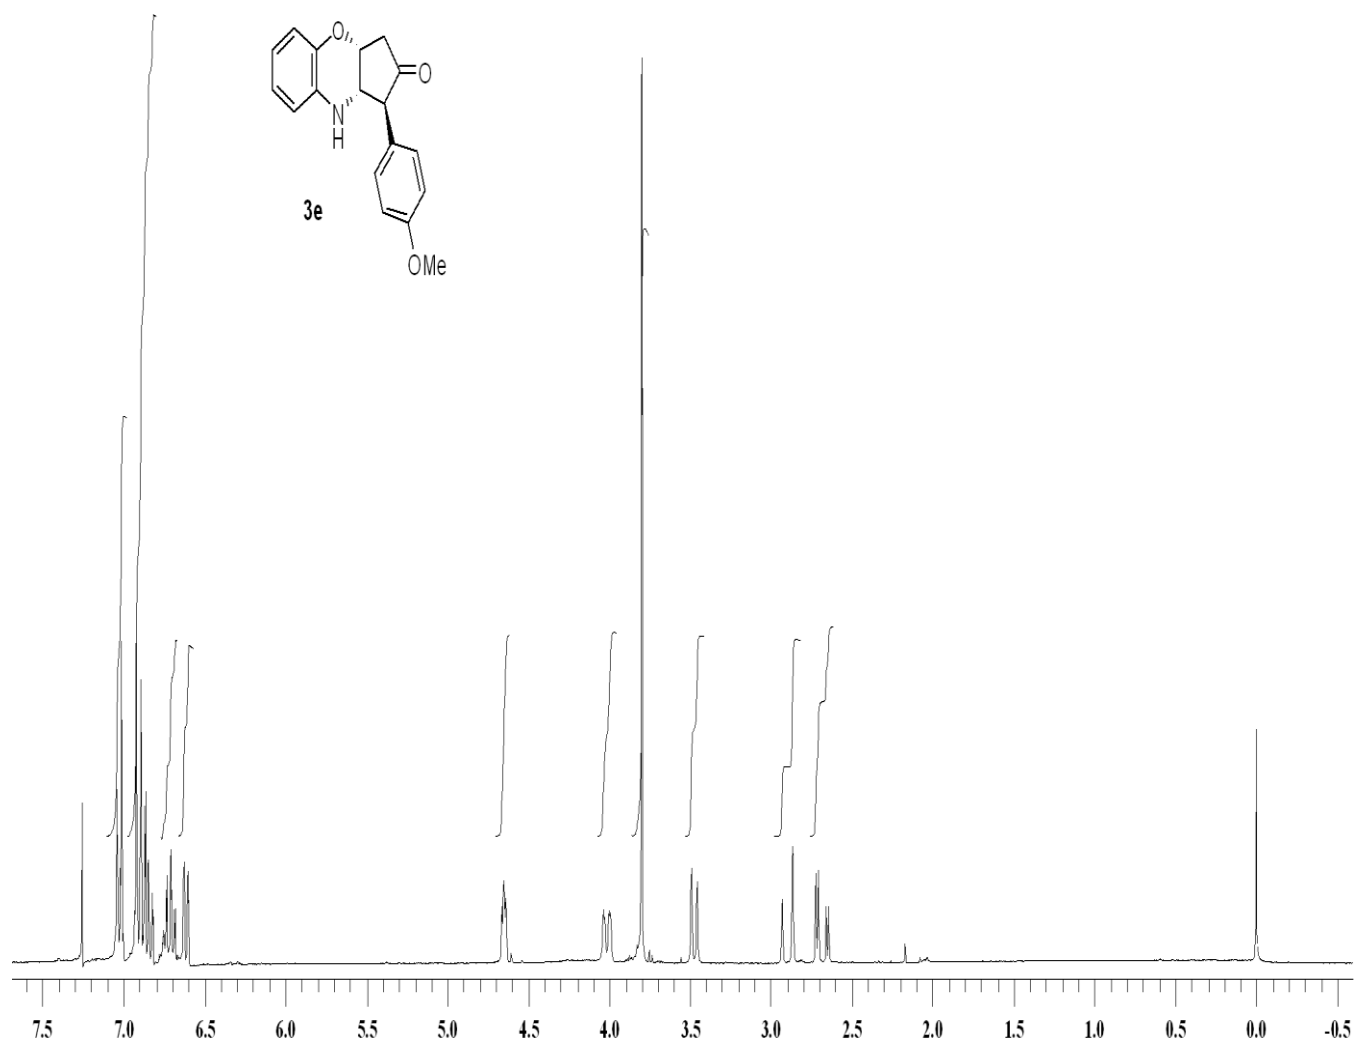

### <sup>13</sup>C spectrum of compound 3e:

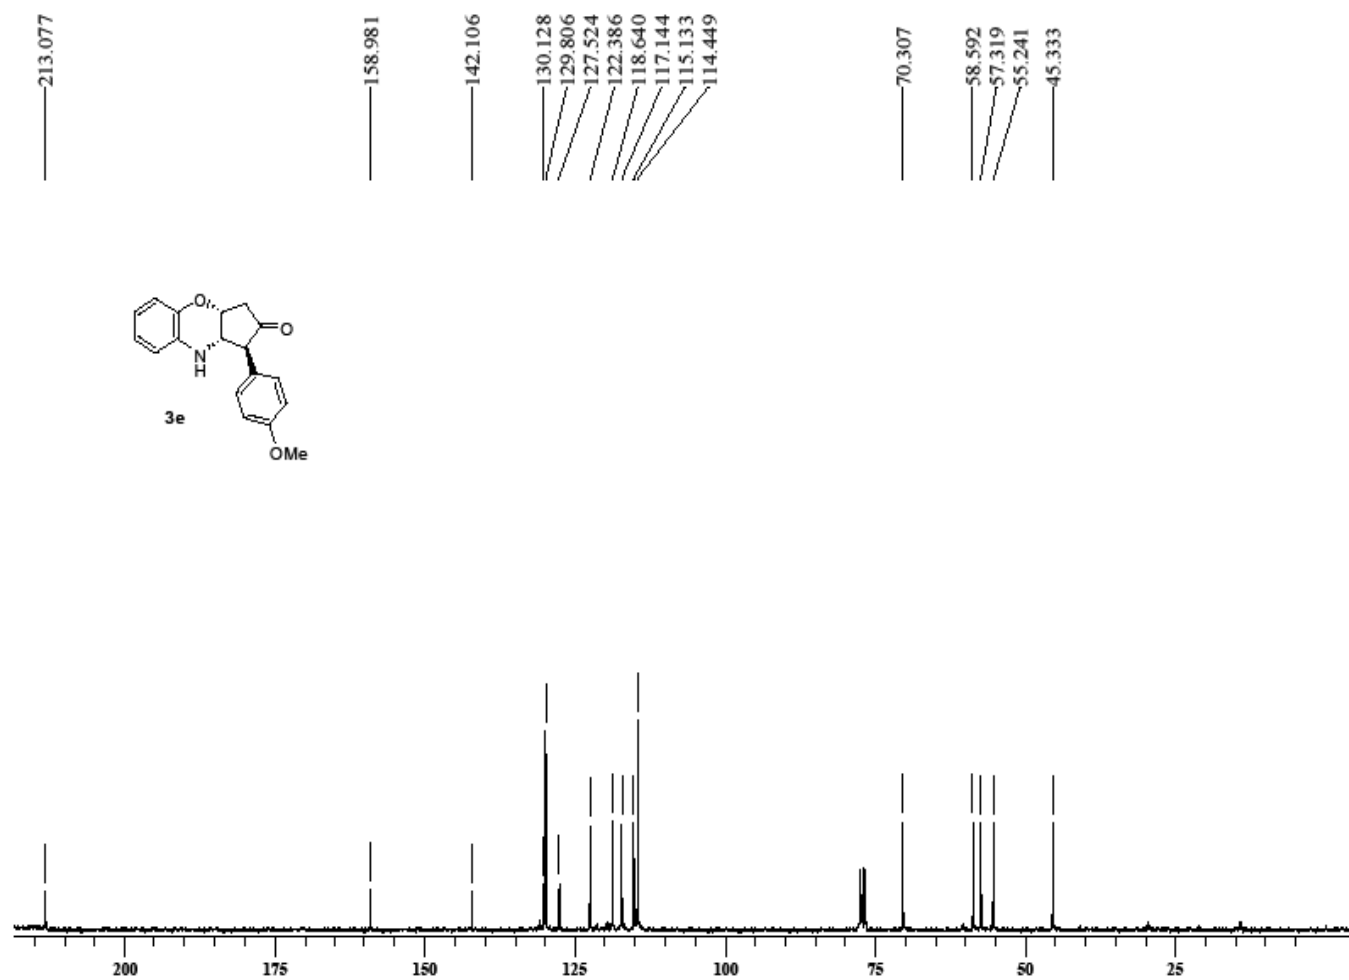

**<sup>1</sup>HNMR Spectrum of Compound 3f:**

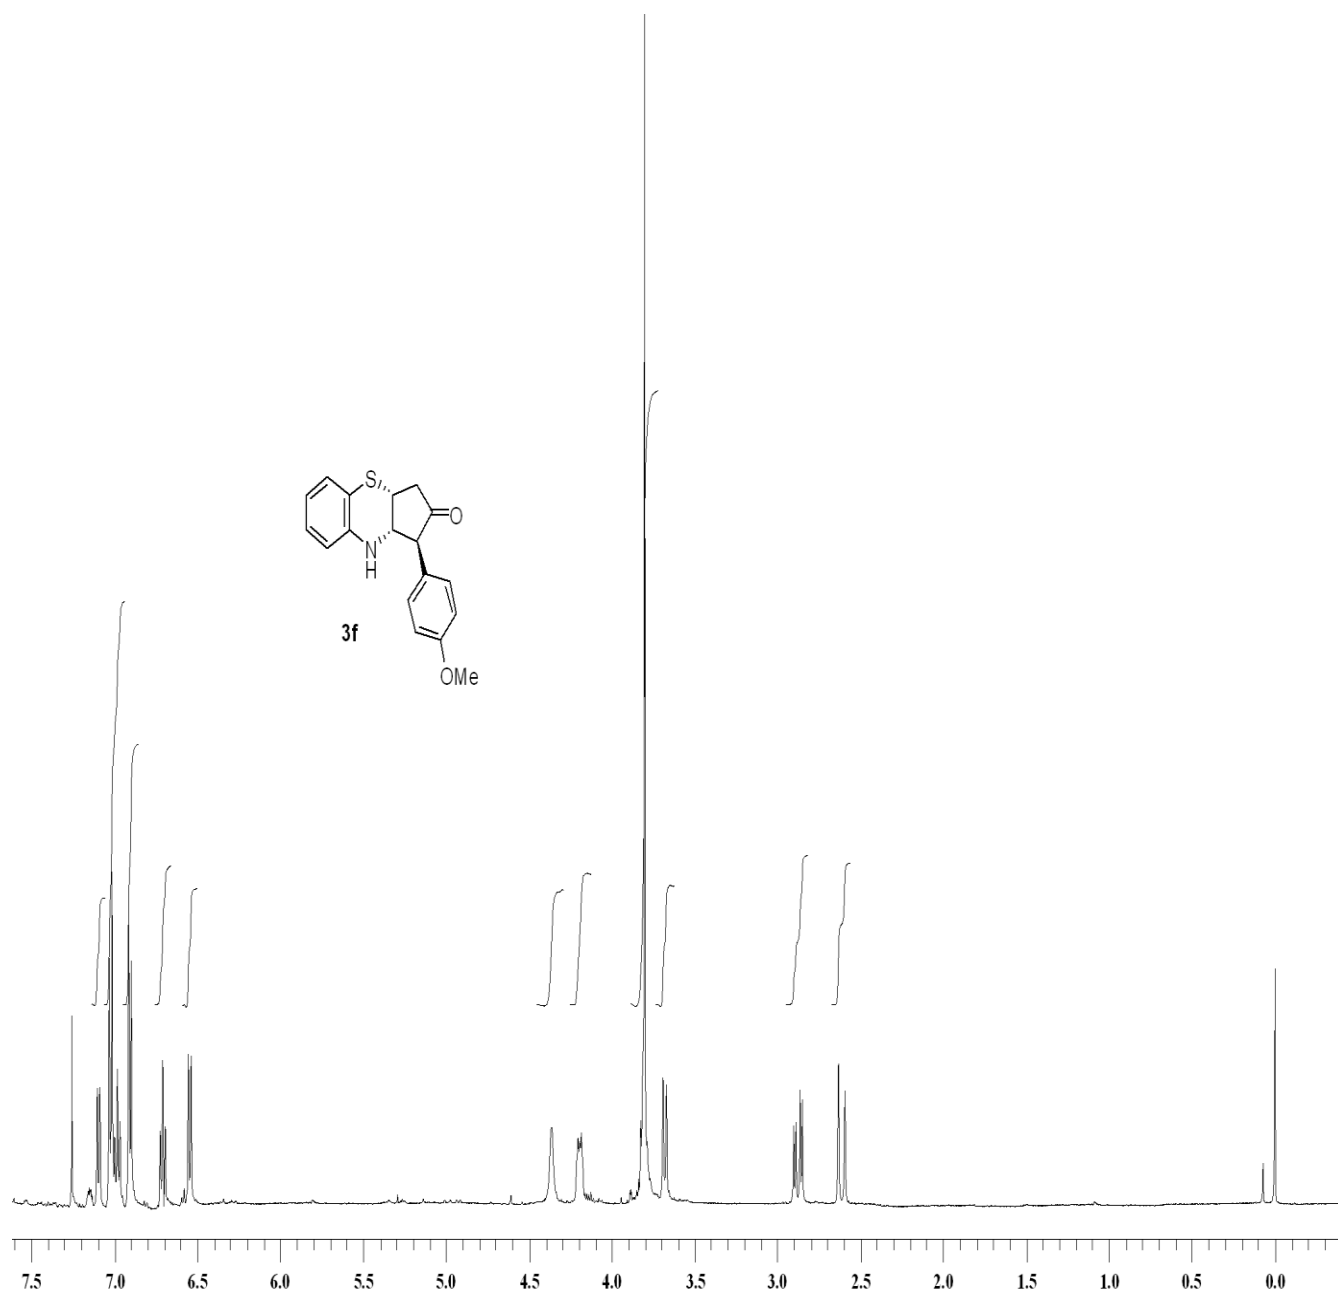

**$^{13}\text{C}$  spectrum of compound 3f:**

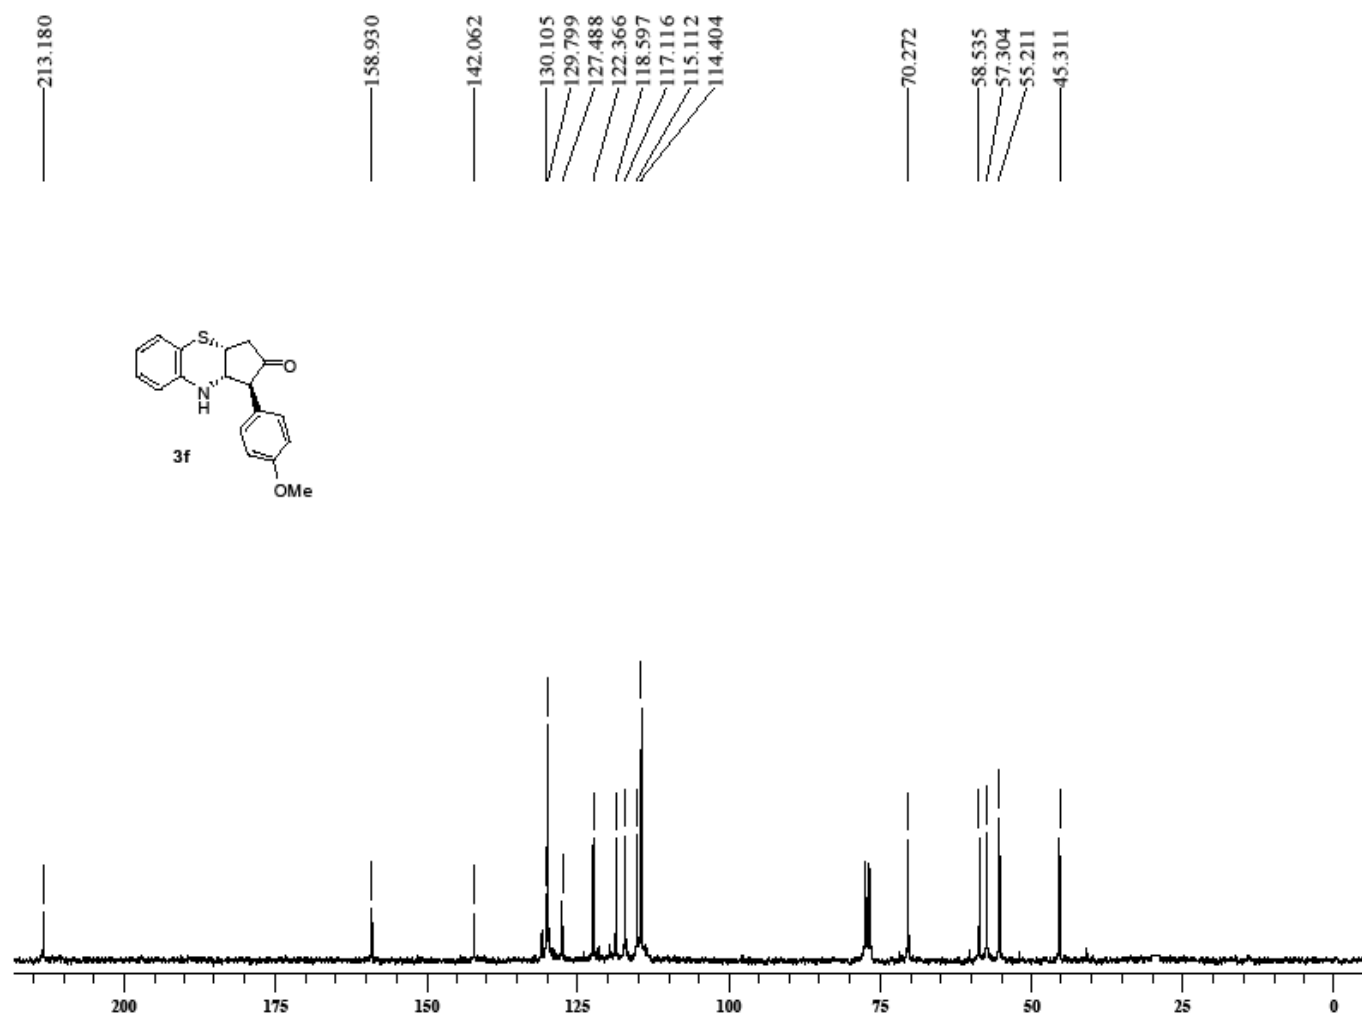

**<sup>1</sup>HNMR Spectrum of Compound 3g:**

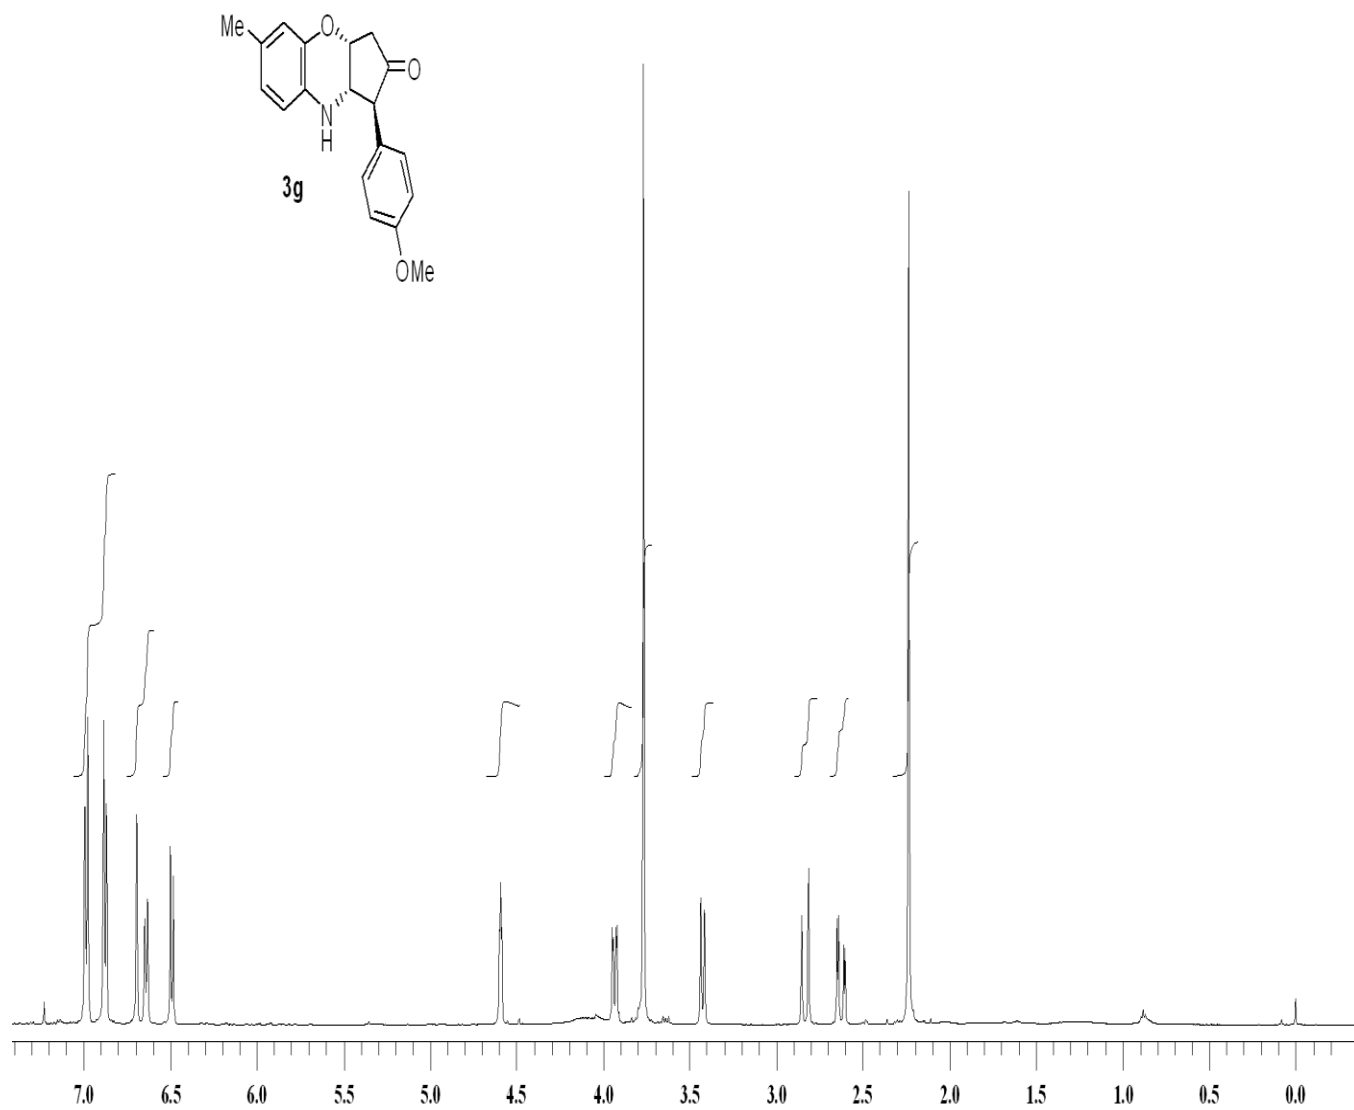

**$^{13}\text{C}$  spectrum of compound 3g:**

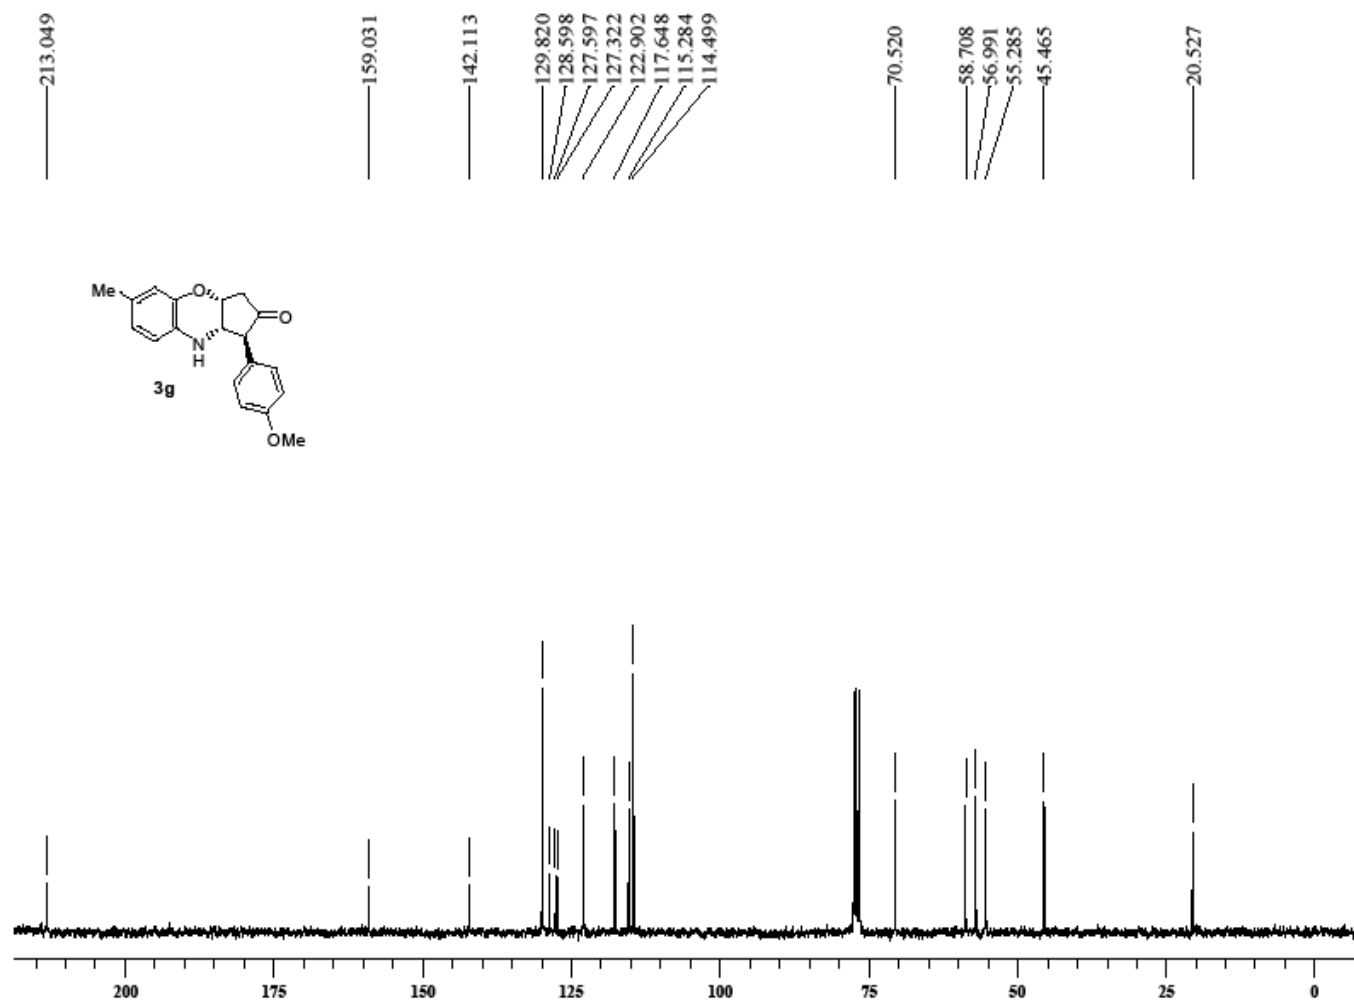

**<sup>1</sup>HNMR Spectrum of Compound 3h:**

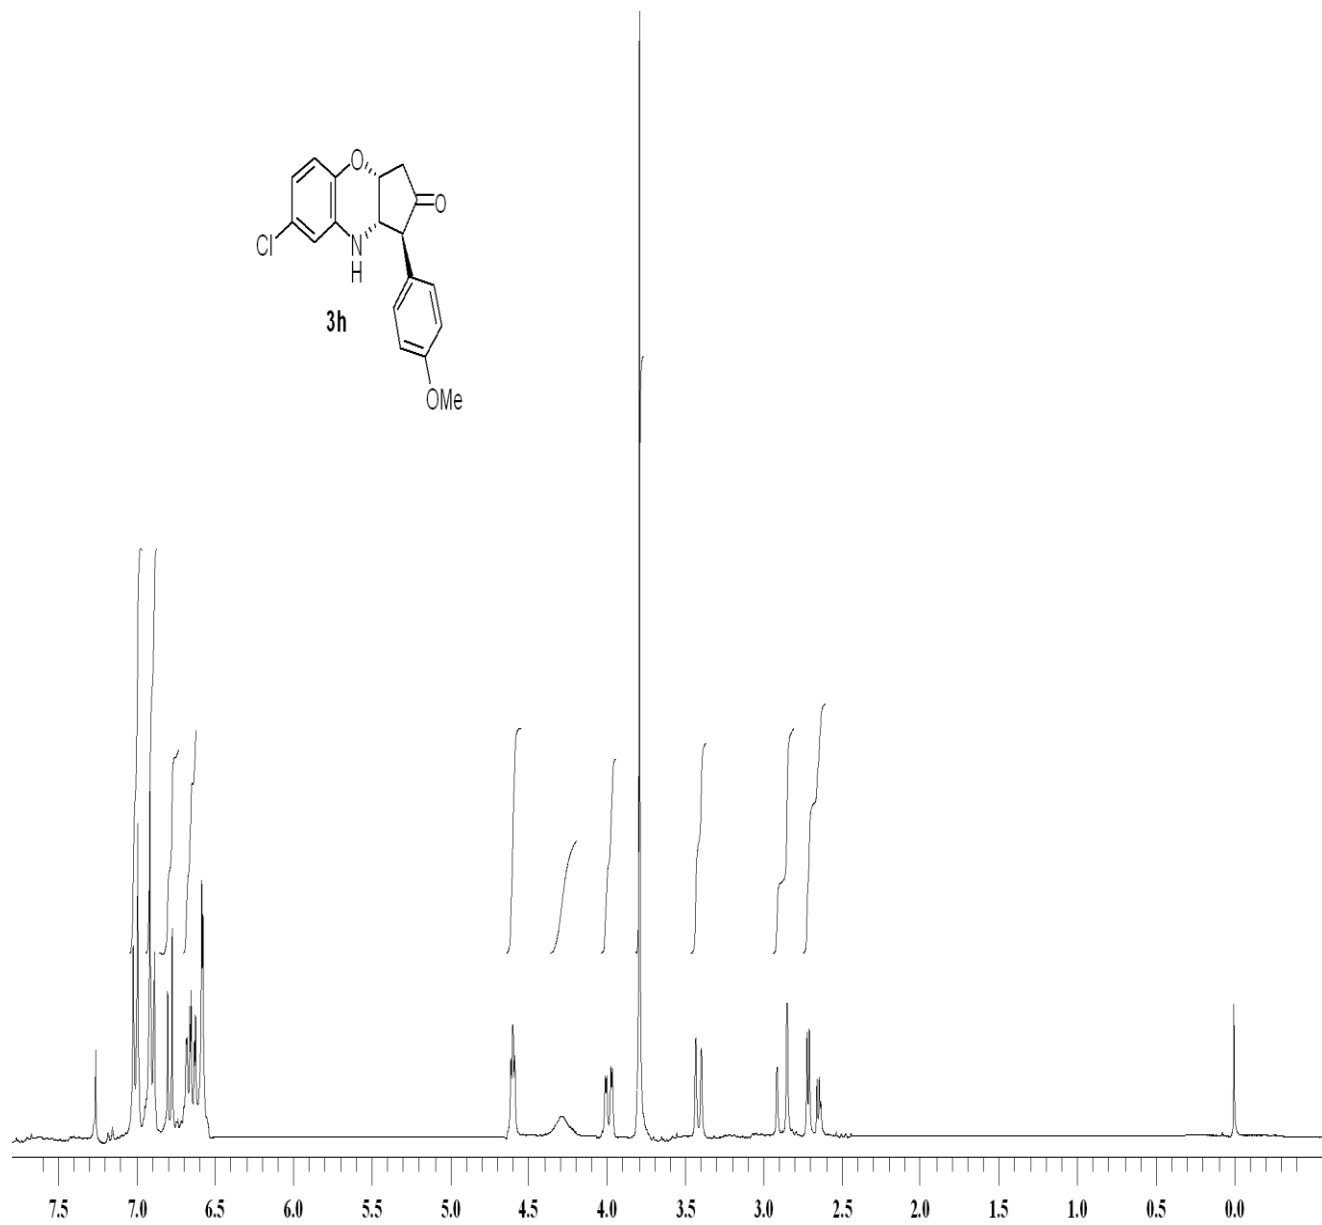



**<sup>1</sup>HNMR Spectrum of Compound 3i:**

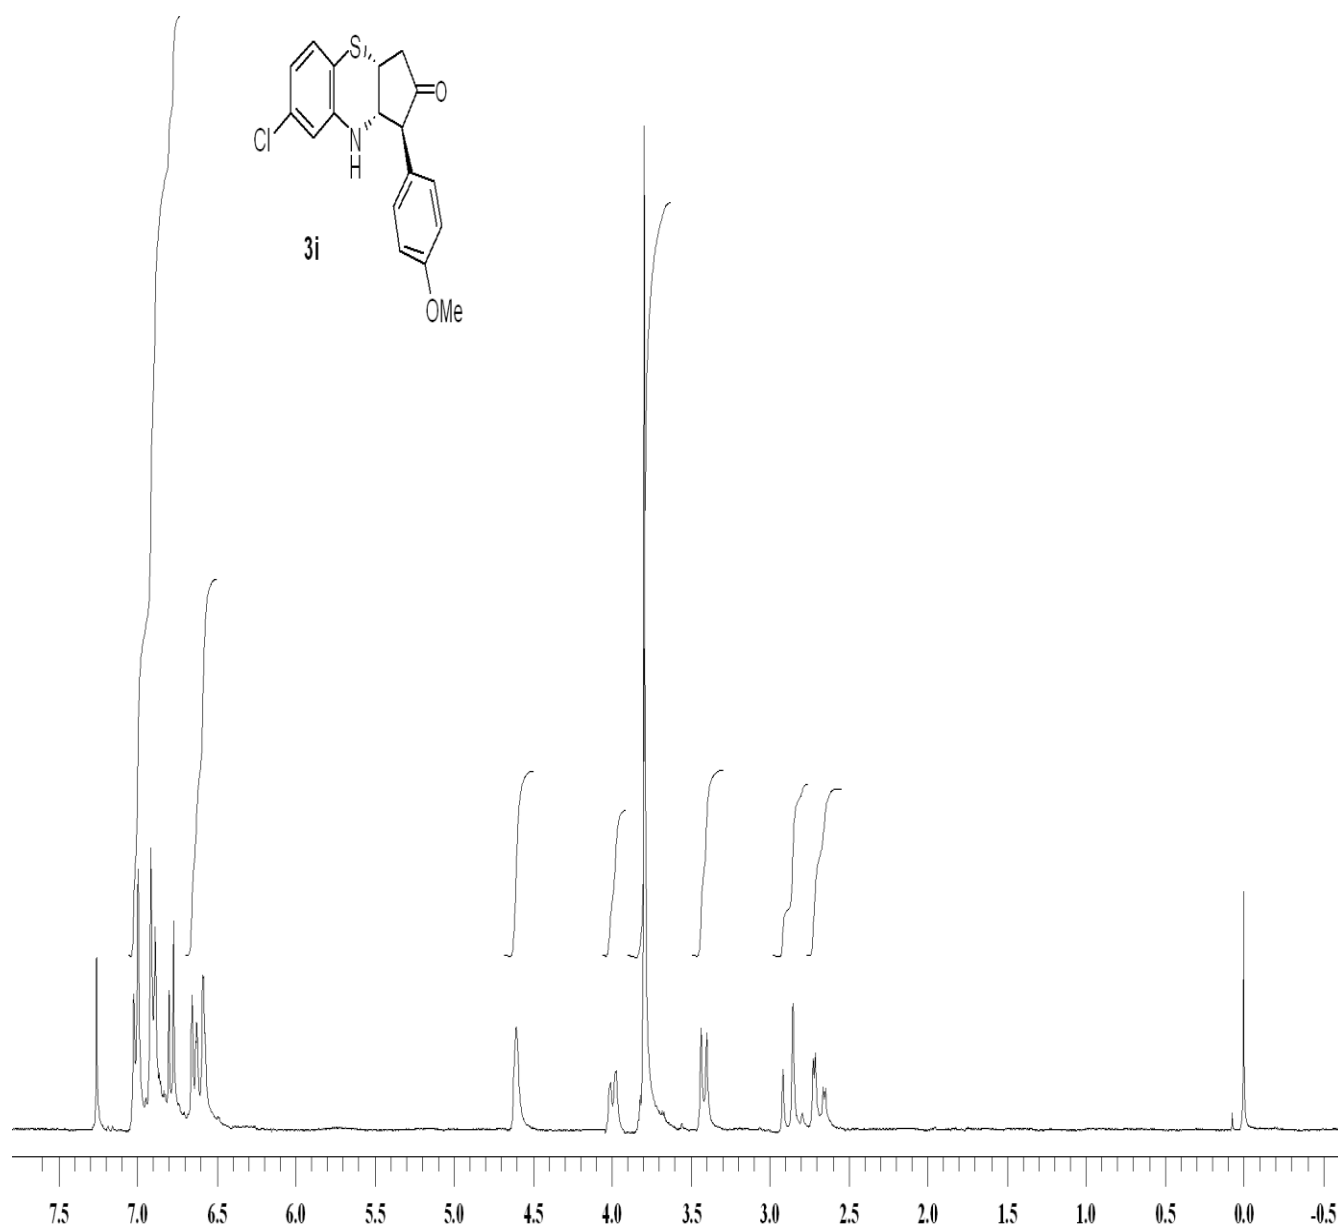

**<sup>1</sup>HNMR Spectrum of Compound 3j:**

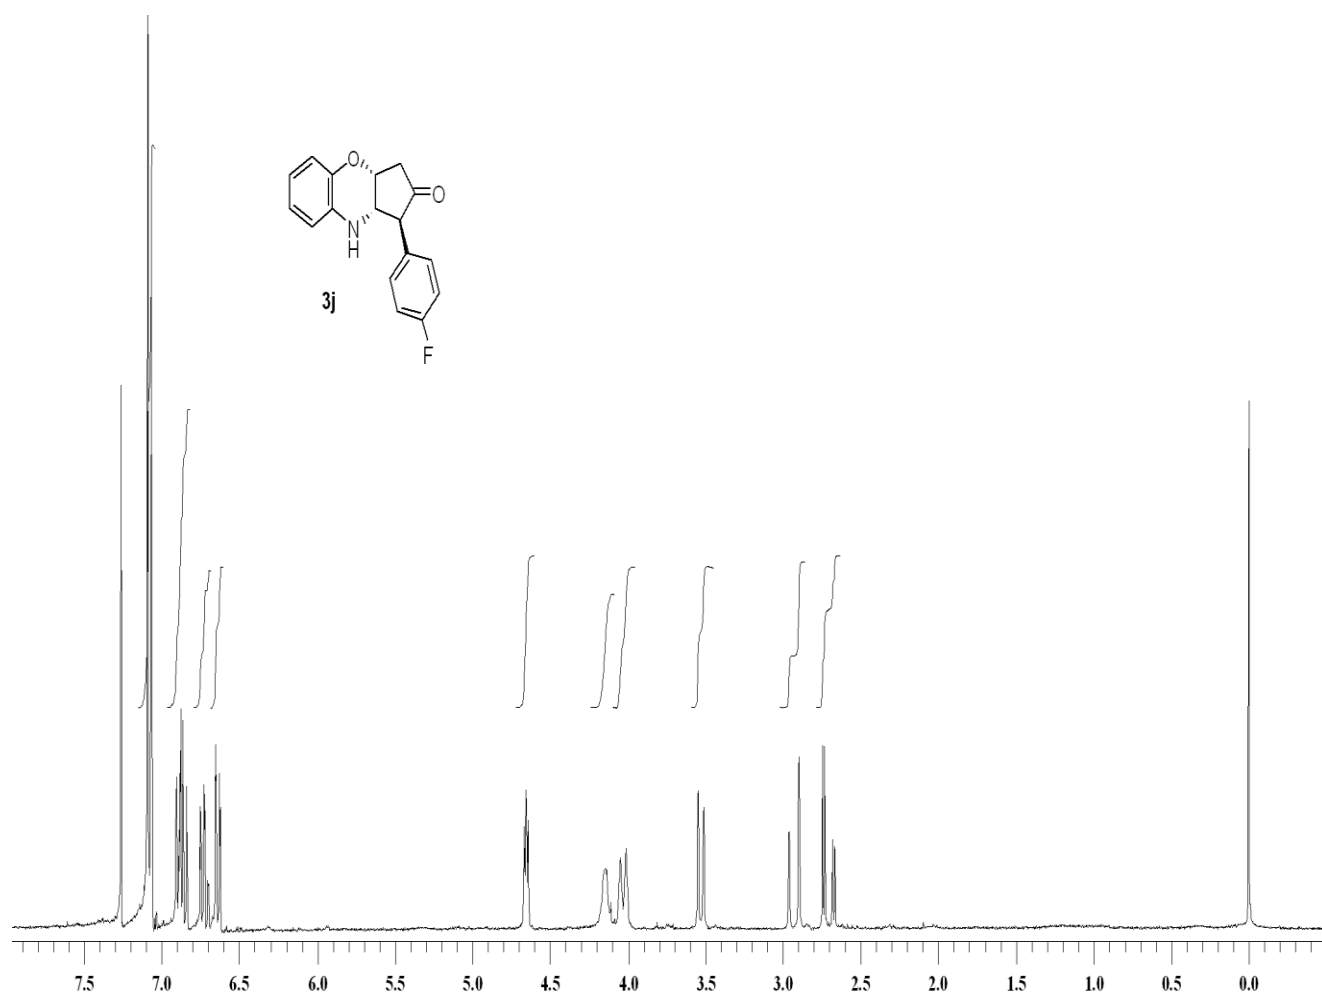

**$^{13}\text{C}$  spectrum of compound 3j:**

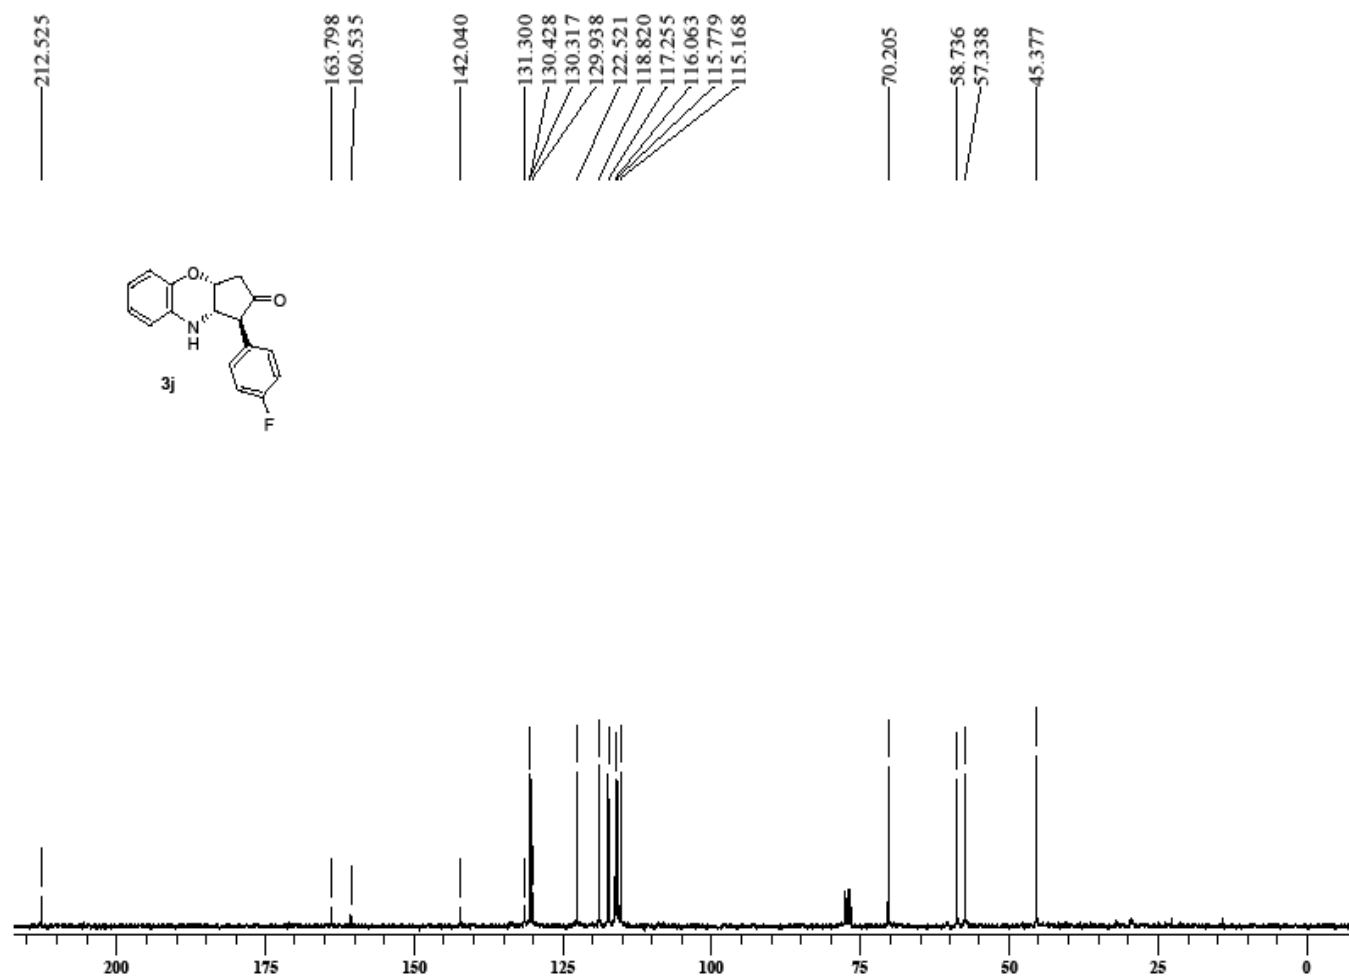

**<sup>1</sup>HNMR Spectrum of Compound 3k:**

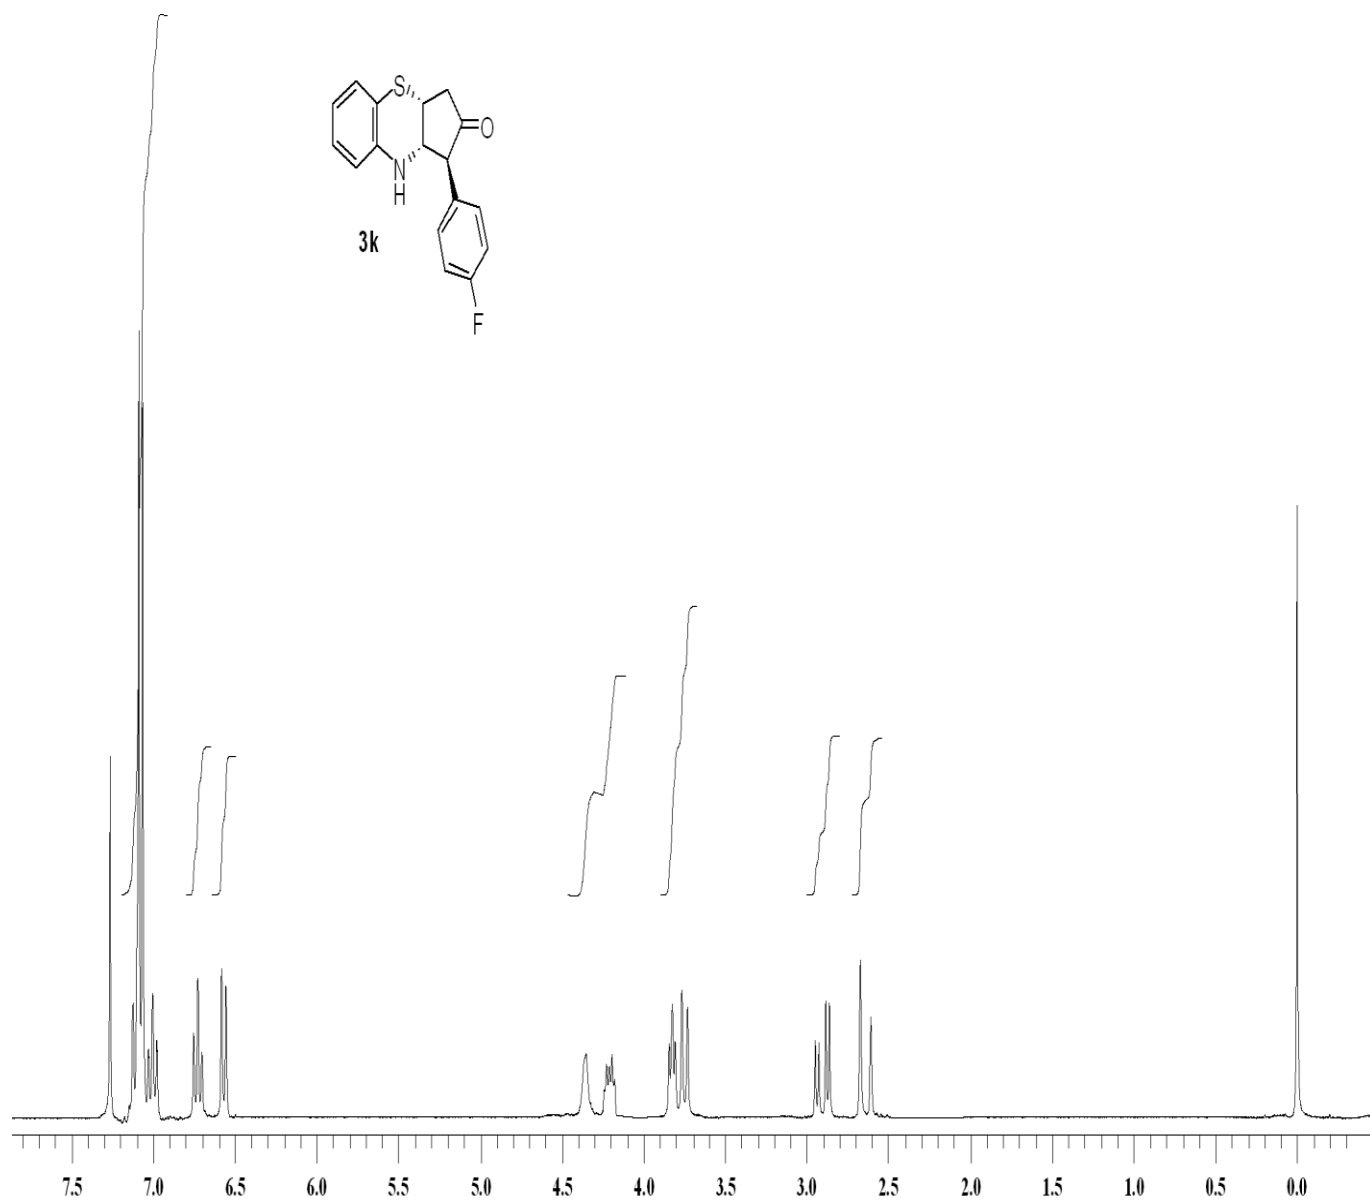

**$^{13}\text{C}$  spectrum of compound 3k:**

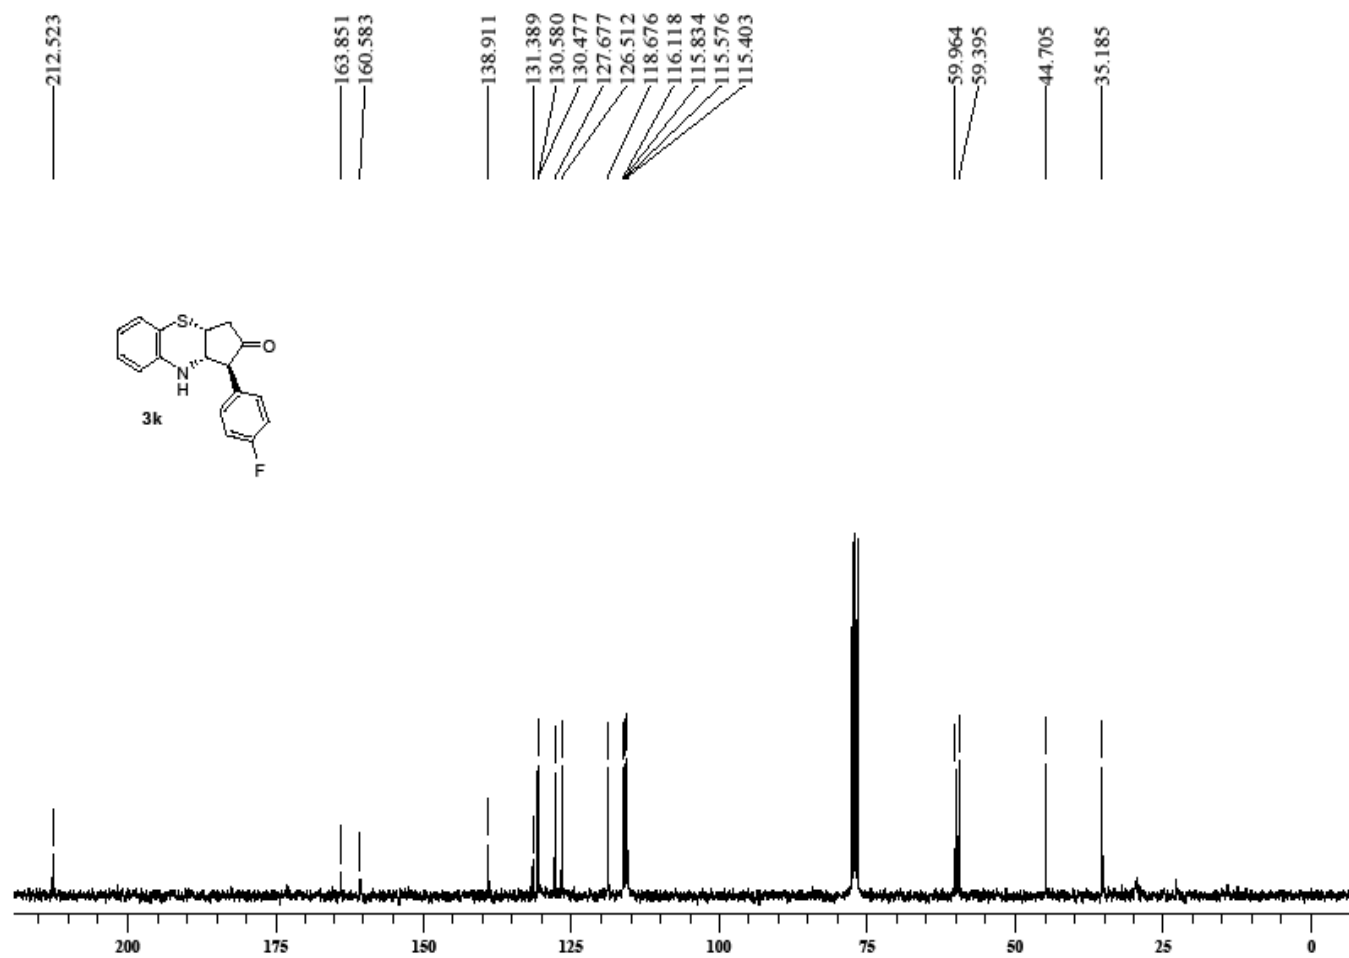

**<sup>1</sup>HNMR Spectrum of Compound 3l:**

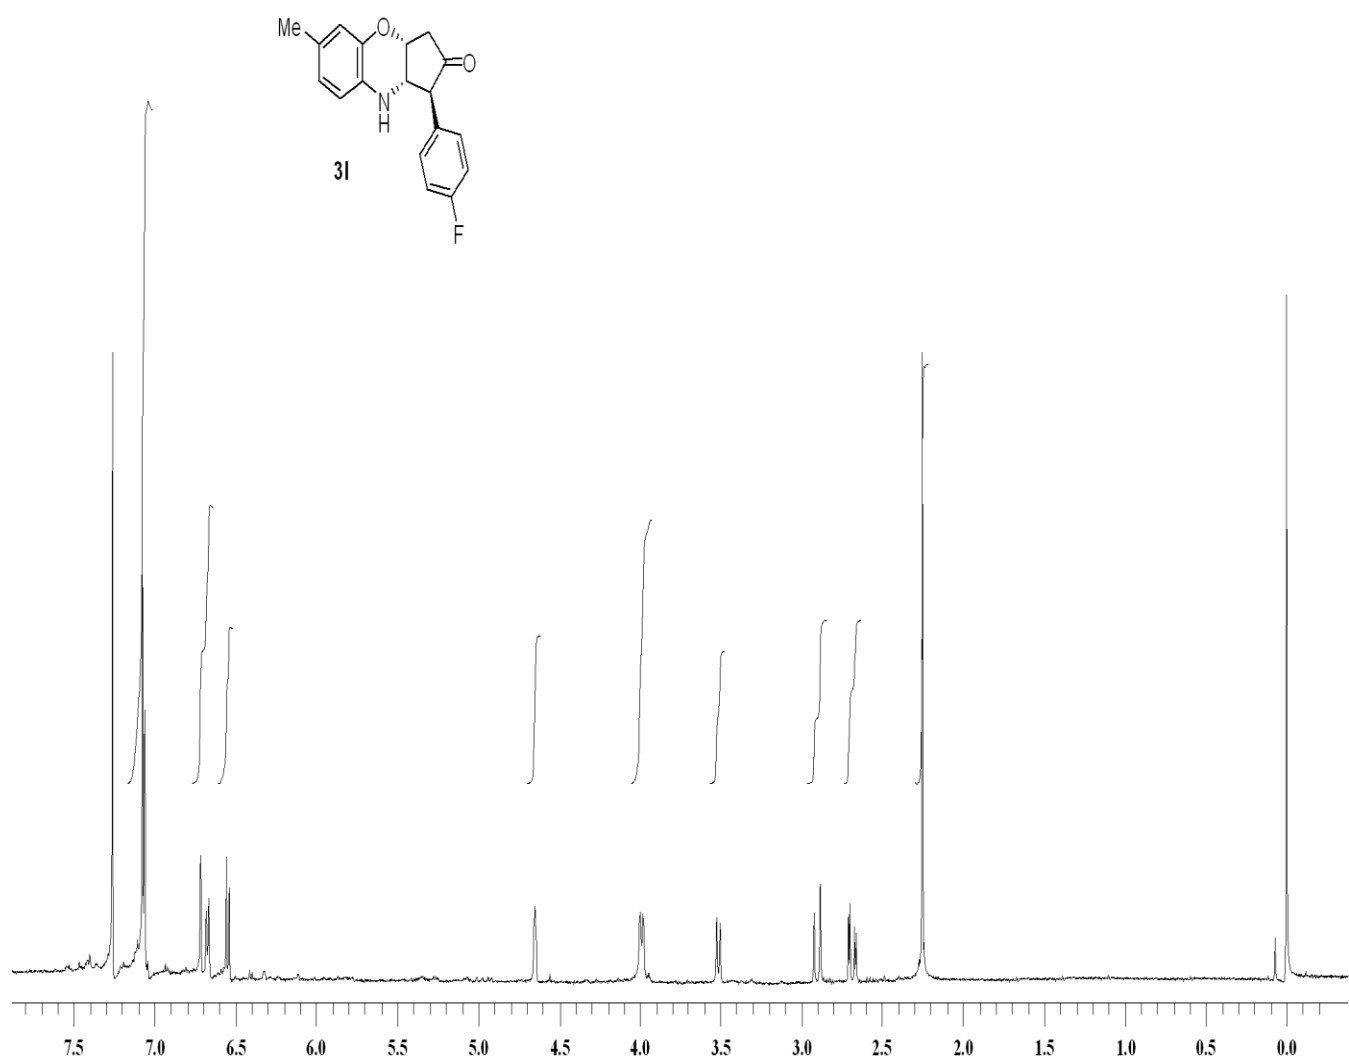

**$^{13}\text{C}$  spectrum of compound 3l:**

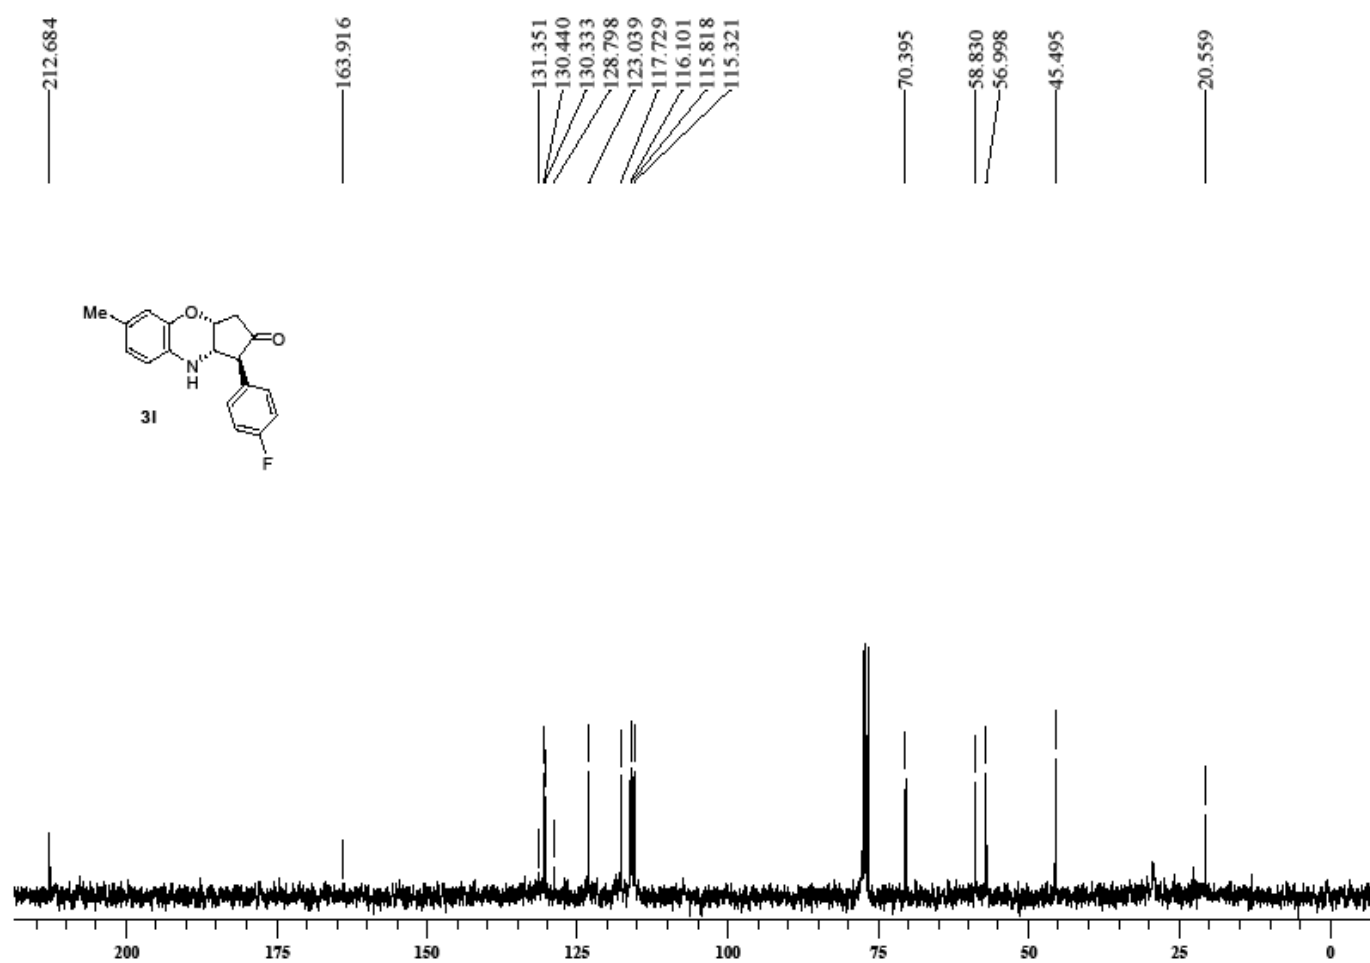

**<sup>1</sup>H NMR Spectrum of Compound 3m:**

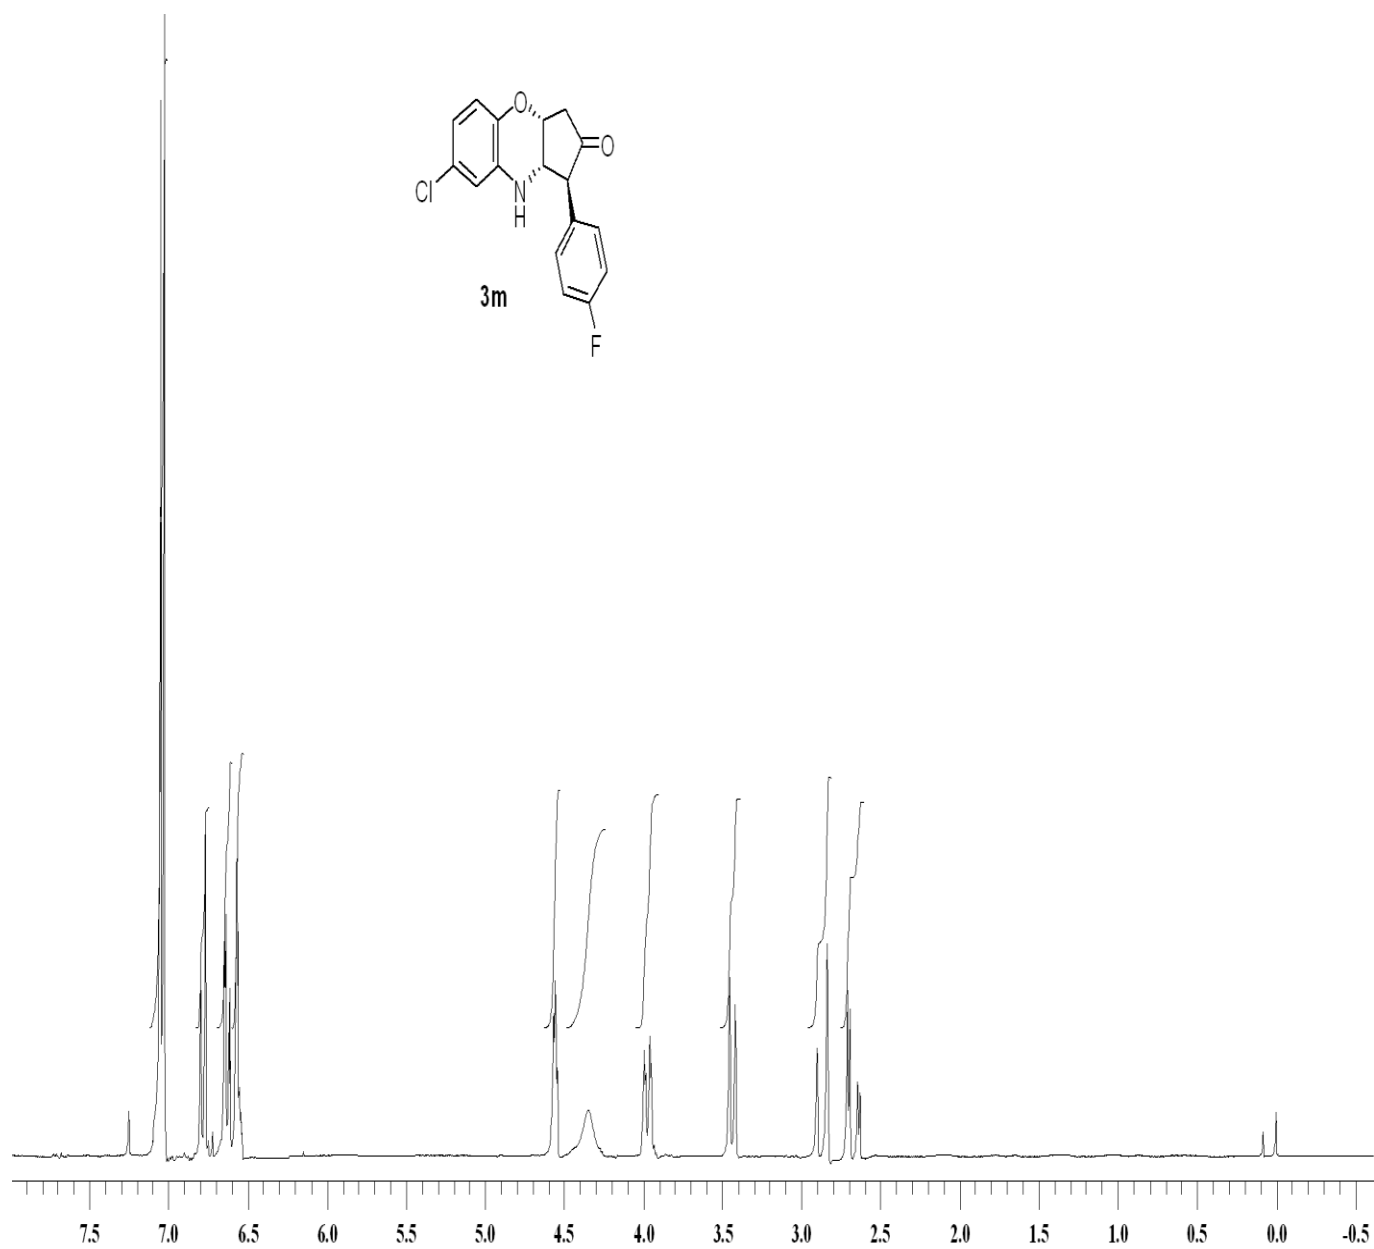



**$^{13}\text{C}$  spectrum of compound 3m:**

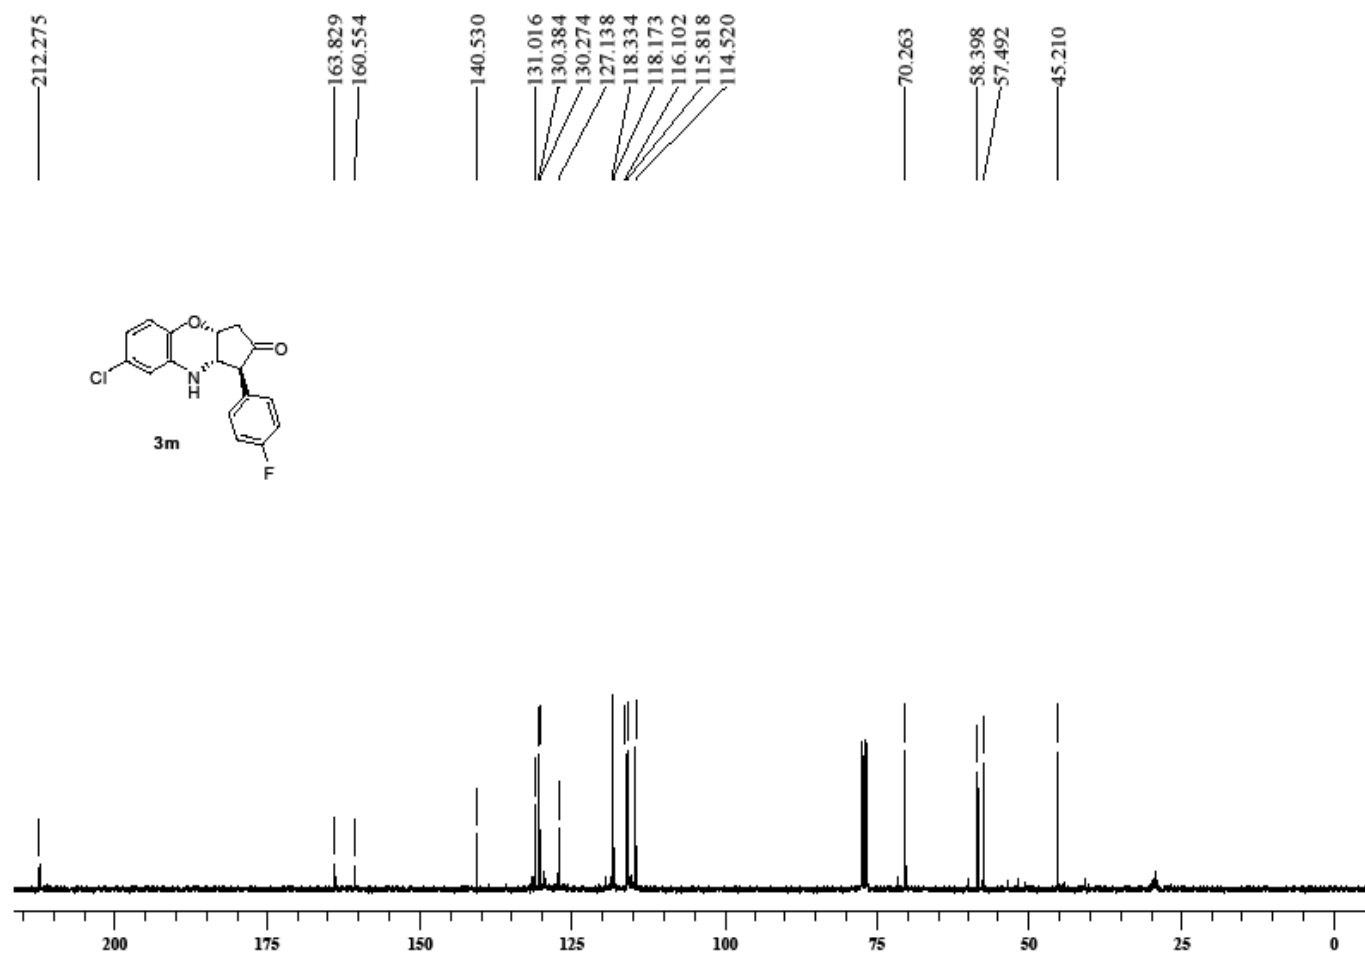

Supplement: c2ra21591h.pdf [file c2ra21591h.pdf]
